# Supplementary material
Source: PubMed Central journal article supplement (PMC9108996)
Supplement: NIHMS1802179-supplement-vox12999-sup-0001-tables1.pdf [file NIHMS1802179-supplement-vox12999-sup-0001-tables1.pdf]

| Gene/variant                                                         | Molecule                                            | Outcome                              | PMID                                                                                                |
|----------------------------------------------------------------------|-----------------------------------------------------|--------------------------------------|-----------------------------------------------------------------------------------------------------|
| <b>Efflux Transporters</b>                                           |                                                     |                                      |                                                                                                     |
| <b>ABCC1 (MRP1)</b>                                                  |                                                     |                                      |                                                                                                     |
| rs4148350, rs45511401                                                | Anthracyclines                                      | toxicity                             | 16330681, 21900104, 23441093                                                                        |
| rs17501331, rs3743527                                                | Irinotecan                                          | toxicity                             | 27845419                                                                                            |
| rs212091                                                             | Lamivudine, Lopinavir, Ritonavir, Zidovudine        | efficacy                             | 23996099                                                                                            |
| rs2238476, rs246240, rs28364006, rs35592, rs3784864                  | Methotrexate                                        | efficacy, toxicity                   | 18256692, 25225283, 26086825, 29743634                                                              |
| rs119774                                                             | Motelukast                                          | efficacy                             | 16293801                                                                                            |
| <b>ABCC4 (MRP4)</b>                                                  |                                                     |                                      |                                                                                                     |
| rs1678387                                                            | Bisphosphonates                                     | toxicity                             | 22267851                                                                                            |
| rs16950650                                                           | Cisplatin                                           | efficacy                             | 23478653                                                                                            |
| rs9561778                                                            | Cyclophosphamide                                    | toxicity                             | 19696793                                                                                            |
| rs17268282                                                           | Furosemide                                          | efficacy                             | 26927285                                                                                            |
| rs9561765                                                            | Imatinib                                            | efficacy                             | 23127916                                                                                            |
| rs16950651                                                           | Irinotecan                                          | efficacy                             | 23478653                                                                                            |
| rs11568658                                                           | Latanoprost                                         | efficacy                             | 25339146                                                                                            |
| rs3765534                                                            | Mercaptopurines                                     | toxicity                             | 18593894, 20393862                                                                                  |
| rs7317112, rs9516519                                                 | Methotrexate                                        | toxicity, pharmacokinetics           | 23222202, 25348617                                                                                  |
| rs1059751, rs1751034, rs3742106                                      | Tenofovir                                           | pharmacokinetics                     | 17597712, 18398970, 25801567, 26807589                                                              |
| rs11568659                                                           | Valganciclovir                                      | toxicity                             | 274021191                                                                                           |
| rs11568660                                                           | Zodovudine                                          | pharmacokinetics                     | 16791115                                                                                            |
| <b>ABCC5 (MRP5)</b>                                                  |                                                     |                                      |                                                                                                     |
| rs10937158, rs3749438                                                | Fluorouracil, Irinotecan,                           | toxicity                             | 26352872                                                                                            |
| <b>ABCG2 (ABCG2)</b>                                                 |                                                     |                                      |                                                                                                     |
| rs2231142                                                            | Opioids and Anesthetics                             | efficacy                             | 30136624                                                                                            |
| rs10011796, rs2231142, rs4148115, rs4148157, rs76979899              | Allopurinol                                         | efficacy, dose                       | 25676789, 26810134, 29341237, 30924126                                                              |
| rs2231142                                                            | Apixaban                                            | pharmacokinetics                     | 28678049, 29457840                                                                                  |
| rs2231142                                                            | Atorvastatin                                        | pharmacokinetics                     | 19474787                                                                                            |
| rs2231142                                                            | Capecitabine, Fluorouracil, Leucovorin, Oxaliplatin | efficacy                             | 20530282, 24338217                                                                                  |
| rs13120400                                                           | Ceftriaxone                                         | pharmacokinetics                     | 29873816                                                                                            |
| rs2231142                                                            | Cyclophosphamide, Doxorubicin, Fluorouracil         | toxicity                             | 29507678                                                                                            |
| rs13120400                                                           | Deferasirox                                         | efficacy, pharmacokinetics           | 27043265, 27193993, 28346059                                                                        |
| rs2231142                                                            | Dolutegravir                                        | metabolism, pharmacokinetics         | 28858994                                                                                            |
| rs2231142                                                            | Efavirenz                                           | toxicity                             | 23859571                                                                                            |
| rs7699188                                                            | Fluorouracil, Irinotecan,                           | efficacy, toxicity                   | 24018773                                                                                            |
| rs2231142                                                            | Fluvastatin                                         | pharmacokinetics                     | 19842935                                                                                            |
| rs2231142                                                            | Gefitinib                                           | toxicity                             | 17148776, 20035425, 21332310, 25554506                                                              |
| rs2231142                                                            | Gemcitabine                                         | efficacy, toxicity                   | 29751792                                                                                            |
| rs12505410, rs13120400, rs2231137, rs2231142, rs2725252              | Imatinib                                            | efficacy, pharmacokinetics           | 18981009, 24123600, 24322003, 30713339                                                              |
| rs2231137                                                            | Irinotecan                                          | toxicity                             | 18221820                                                                                            |
| rs2231142, rs3114020                                                 | Lamotrigine                                         | efficacy, pharmacokinetics           | 26213157, 27610747, 29791014                                                                        |
| rs13137622, rs13120400, rs12505410, rs17731538, rs2231135, rs2231142 | Methotrexate                                        | efficacy, toxicity, pharmacokinetics | 18256692, 20386493, 25778468, 27217051, 29791011                                                    |
| rs131200400, rs2231142                                               | Rosuvastatin                                        | efficacy                             | 16784736, 19474787, 20130569, 20207952, 20679960, 22331829, 23876492, 23930675, 25630984, 28322941, |
| rs2231142                                                            | Simvastatin                                         | pharmacokinetics                     | 19842935                                                                                            |
| rs2231142, rs72552713                                                | Sulfasalazine                                       | efficacy, pharmacokinetics           | 18167504, 24394199, 25872459, 28322941                                                              |
| rs2231142                                                            | Sunitinib                                           | toxicity                             | 24013576, 25344452, 26244574                                                                        |
| rs2231142                                                            | Enofovir                                            | pharmacokinetics                     | 28462920                                                                                            |
| rs4148157                                                            | Topotecan                                           | pharmacokinetics                     | 27052877                                                                                            |

| <b>Uptake Transporters</b>                                                                                                                                                                                                                                                                                                                                                                                                                                                                                                                                                                                                                 |                                      |                    |                                                                                                                                                                                                                                                                                                                                                                                                                                                                                      |  |
|--------------------------------------------------------------------------------------------------------------------------------------------------------------------------------------------------------------------------------------------------------------------------------------------------------------------------------------------------------------------------------------------------------------------------------------------------------------------------------------------------------------------------------------------------------------------------------------------------------------------------------------------|--------------------------------------|--------------------|--------------------------------------------------------------------------------------------------------------------------------------------------------------------------------------------------------------------------------------------------------------------------------------------------------------------------------------------------------------------------------------------------------------------------------------------------------------------------------------|--|
| <i>SLC16A1</i> (MCT1)                                                                                                                                                                                                                                                                                                                                                                                                                                                                                                                                                                                                                      |                                      |                    |                                                                                                                                                                                                                                                                                                                                                                                                                                                                                      |  |
| N/A                                                                                                                                                                                                                                                                                                                                                                                                                                                                                                                                                                                                                                        |                                      |                    |                                                                                                                                                                                                                                                                                                                                                                                                                                                                                      |  |
| <i>SLC19A1</i> (RFC1)                                                                                                                                                                                                                                                                                                                                                                                                                                                                                                                                                                                                                      |                                      |                    |                                                                                                                                                                                                                                                                                                                                                                                                                                                                                      |  |
| rs1051266                                                                                                                                                                                                                                                                                                                                                                                                                                                                                                                                                                                                                                  | Platinum compounds                   | efficacy           | 29662106                                                                                                                                                                                                                                                                                                                                                                                                                                                                             |  |
| rs12659                                                                                                                                                                                                                                                                                                                                                                                                                                                                                                                                                                                                                                    | Carboplatin, Cisplatin, Fluorouracil | efficacy           | 16875718                                                                                                                                                                                                                                                                                                                                                                                                                                                                             |  |
| rs1051266, rs12659                                                                                                                                                                                                                                                                                                                                                                                                                                                                                                                                                                                                                         | Imatinib                             | toxicity           | 30237583                                                                                                                                                                                                                                                                                                                                                                                                                                                                             |  |
| rs1051266                                                                                                                                                                                                                                                                                                                                                                                                                                                                                                                                                                                                                                  | Irinotecan                           | efficacy           | 24143213                                                                                                                                                                                                                                                                                                                                                                                                                                                                             |  |
| rs1051266, rs2838958, rs9977268                                                                                                                                                                                                                                                                                                                                                                                                                                                                                                                                                                                                            | Methotrexate                         | efficacy, toxicity | 12411325, 12915598, 15457444, 15564880, 15677700, 16462575, 17180579, 17264302, 17323057, 17325736, 18322994, 18458567, 19827168, 20335220, 21747412, 22450926, 22838948, 23095111, 24241962, 24350725, 24597986, 25074866, 25303299, 25778468, 26616421, 27217051, 27217051, 27409003, 28525903, 28525903                                                                                                                                                                           |  |
| rs1051298, rs3788189, rs914232                                                                                                                                                                                                                                                                                                                                                                                                                                                                                                                                                                                                             | Pemetrexed                           | efficacy           | 19841321, 24732178                                                                                                                                                                                                                                                                                                                                                                                                                                                                   |  |
| <i>SLC29A1</i> (ENT1)                                                                                                                                                                                                                                                                                                                                                                                                                                                                                                                                                                                                                      |                                      |                    |                                                                                                                                                                                                                                                                                                                                                                                                                                                                                      |  |
| rs507964                                                                                                                                                                                                                                                                                                                                                                                                                                                                                                                                                                                                                                   | Mercaptopurine                       | pharmacokinetics   | 27941536                                                                                                                                                                                                                                                                                                                                                                                                                                                                             |  |
| <b>Ion Transporters</b>                                                                                                                                                                                                                                                                                                                                                                                                                                                                                                                                                                                                                    |                                      |                    |                                                                                                                                                                                                                                                                                                                                                                                                                                                                                      |  |
| <i>ATP7A</i> (MNK)                                                                                                                                                                                                                                                                                                                                                                                                                                                                                                                                                                                                                         |                                      |                    |                                                                                                                                                                                                                                                                                                                                                                                                                                                                                      |  |
| rs2227291                                                                                                                                                                                                                                                                                                                                                                                                                                                                                                                                                                                                                                  | Docetaxel, Thalidomide               | toxicity           | 20038957                                                                                                                                                                                                                                                                                                                                                                                                                                                                             |  |
| <i>CFTR</i> (CFTR)                                                                                                                                                                                                                                                                                                                                                                                                                                                                                                                                                                                                                         |                                      |                    |                                                                                                                                                                                                                                                                                                                                                                                                                                                                                      |  |
| rs113993959, rs75039782, rs77010898                                                                                                                                                                                                                                                                                                                                                                                                                                                                                                                                                                                                        | Ataluren                             | efficacy           | 18722008, 20622033, 21233271, 24836205                                                                                                                                                                                                                                                                                                                                                                                                                                               |  |
| rs113993960                                                                                                                                                                                                                                                                                                                                                                                                                                                                                                                                                                                                                                | Cavosonstat                          | efficacy           | 28209466                                                                                                                                                                                                                                                                                                                                                                                                                                                                             |  |
| rs113993960                                                                                                                                                                                                                                                                                                                                                                                                                                                                                                                                                                                                                                | Cysteamine                           | efficacy           | 27035618                                                                                                                                                                                                                                                                                                                                                                                                                                                                             |  |
| rs113993958, rs113993960, rs115545701, rs11971167, rs121908751, rs121908752, rs121908753, rs121908755, rs121908757, rs121909005, rs121909011, rs121909013, rs121909019, rs121909020, rs121909041, rs121909047, rs141033578, rs150212784, rs1800100, rs1800111, rs186045772, rs193922525, rs202179988, rs267606723, rs34911792, rs368505753, rs397508139, rs397508256, rs397508288, rs397508328, rs397508435, rs397508442, rs397508453, rs397508510, rs397508513, rs397508537, rs397508602, rs397508759, rs74503330, rs74551128, rs75527207, rs75541969, rs77010898, rs77409459, rs77834169, rs77932196, rs78655421, rs78769542, rs80282562 | Ivacaftor                            | efficacy, toxicity | 19846789, 21083385, 21602569, 21825083, 21976485, 22047557, 22293084, 22383668, 22942289, 23027855, 23313410, 23590265, 23757359, 23757361, 23891399, 24081349, 24902474, 24973281, 25148434, 25266159, 25698453, 25981758, 26070913, 26324139, 26474553, 26968770, 27007499, 27160424, 27214033, 27298017, 27334259, 27707539, 27805836, 27812499, 27898234, 28325531, 28371569, 28419121, 28606620, 28930490, 28947035, 29099333, 29099344, 29126871, 29279204, 29327948, 29451946 |  |
| rs113993960, rs113993960, rs121909011, rs121909047, rs74551128                                                                                                                                                                                                                                                                                                                                                                                                                                                                                                                                                                             | Lumacaftor                           | efficacy, toxicity | 21825083, 21976485, 24973281, 24973281, 25981758, 27214033, 27298017, 27334259, 27805836, 27898234, 28325531, 28606620, 29126871, 29327948, 29451946                                                                                                                                                                                                                                                                                                                                 |  |
| rs113993960, rs75527207                                                                                                                                                                                                                                                                                                                                                                                                                                                                                                                                                                                                                    | Tezacaftor                           | efficacy           | 28930490, 29099333, 29099344                                                                                                                                                                                                                                                                                                                                                                                                                                                         |  |
| <b>Vesicle trafficking</b>                                                                                                                                                                                                                                                                                                                                                                                                                                                                                                                                                                                                                 |                                      |                    |                                                                                                                                                                                                                                                                                                                                                                                                                                                                                      |  |
| <i>FLOT1</i> (FLOT1)                                                                                                                                                                                                                                                                                                                                                                                                                                                                                                                                                                                                                       |                                      |                    |                                                                                                                                                                                                                                                                                                                                                                                                                                                                                      |  |
| rs3909184                                                                                                                                                                                                                                                                                                                                                                                                                                                                                                                                                                                                                                  | Carbamazepine                        | hypersensitivity   | 21738081, 26083016                                                                                                                                                                                                                                                                                                                                                                                                                                                                   |  |
| <b>Metabolic Enzymes</b>                                                                                                                                                                                                                                                                                                                                                                                                                                                                                                                                                                                                                   |                                      |                    |                                                                                                                                                                                                                                                                                                                                                                                                                                                                                      |  |
| <i>CYP4F3</i> (LTB4H)                                                                                                                                                                                                                                                                                                                                                                                                                                                                                                                                                                                                                      |                                      |                    |                                                                                                                                                                                                                                                                                                                                                                                                                                                                                      |  |
| N/A                                                                                                                                                                                                                                                                                                                                                                                                                                                                                                                                                                                                                                        |                                      |                    |                                                                                                                                                                                                                                                                                                                                                                                                                                                                                      |  |
| <i>EPHX1</i> (EPHX1)                                                                                                                                                                                                                                                                                                                                                                                                                                                                                                                                                                                                                       |                                      |                    |                                                                                                                                                                                                                                                                                                                                                                                                                                                                                      |  |
| rs1051740, rs2234922                                                                                                                                                                                                                                                                                                                                                                                                                                                                                                                                                                                                                       | Carbamazepine                        | dose               | 15692831, 19620853, 22188362, 23252947, 26314341, 26555147                                                                                                                                                                                                                                                                                                                                                                                                                           |  |
| rs1051740                                                                                                                                                                                                                                                                                                                                                                                                                                                                                                                                                                                                                                  | Cisplatin, Cyclophosphamide          | toxicity           | 24533712                                                                                                                                                                                                                                                                                                                                                                                                                                                                             |  |
| rs2234922                                                                                                                                                                                                                                                                                                                                                                                                                                                                                                                                                                                                                                  | Docetaxel                            | dose               | 20157331                                                                                                                                                                                                                                                                                                                                                                                                                                                                             |  |
| rs1051740                                                                                                                                                                                                                                                                                                                                                                                                                                                                                                                                                                                                                                  | Phenprocoumon                        | efficacy           | 21057703, 21110013                                                                                                                                                                                                                                                                                                                                                                                                                                                                   |  |
| rs1051740, rs2234922                                                                                                                                                                                                                                                                                                                                                                                                                                                                                                                                                                                                                       | Phenytoin                            | toxicity           | 19952982                                                                                                                                                                                                                                                                                                                                                                                                                                                                             |  |
| rs1131873, rs1877724                                                                                                                                                                                                                                                                                                                                                                                                                                                                                                                                                                                                                       | Warfarin                             | dose               | 19794411, 21192345, 21593757, 23061746                                                                                                                                                                                                                                                                                                                                                                                                                                               |  |
